# Supplementary material for: Future Projections and Uncertainties of CMIP6 for Hydrological Indicators and Their Discrepancies from CMIP5 over South Korea
Source: MDPI journal article supplement (doi:10.3390/w14182926), 2022-09-18
Supplement: s1 [file s1]

Archive with 1 entries (1 files):
- water-1911805-supplementary.pdf
