# Supplementary material for: Future Projections and Uncertainties of CMIP6 for Hydrological Indicators and Their Discrepancies from CMIP5 over South Korea
Source: MDPI journal article supplement (doi:10.3390/w14182926), 2022-09-18
Supplement: s1 [file s1 › water-1911805-supplementary.pdf]

**Supplementary Materials to**  
**"Future projections and uncertainties of CMIP6 for hydrological indicators and their**  
**discrepancies from CMIP5 over South Korea"**

Manh Van Doi<sup>1</sup> and Jongho Kim<sup>1\*</sup>

<sup>1</sup>School of Civil and Environmental Engineering, University of Ulsan, South Korea

August 26, 2022

*\*Corresponding author:* Prof. Jongho Kim, School of Civil and Environmental Engineering,  
University of Ulsan, South Korea, tel: (+82) 052-259-2855, email: [kjongho@ulsan.ac.kr](mailto:kjongho@ulsan.ac.kr)

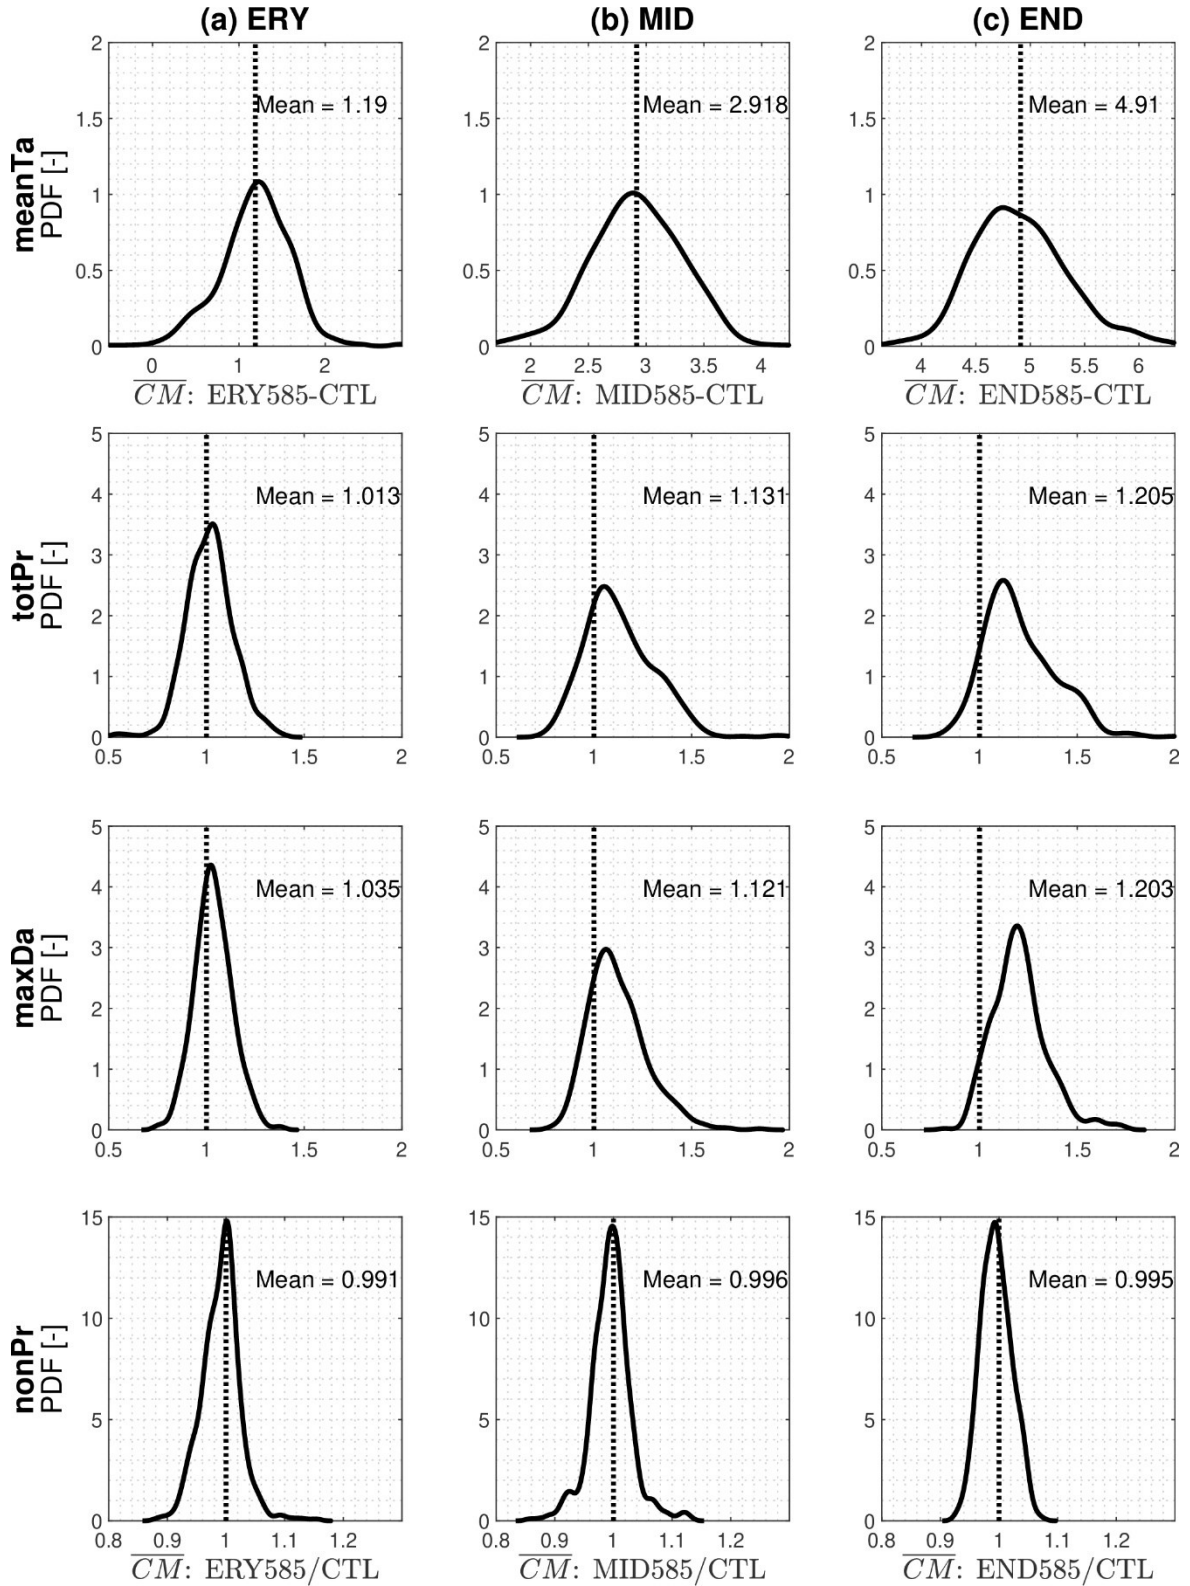

**Figure S1.** Non-parametric kernel distribution for the FOCs of the  $\overline{CM}$  values over South Korea with scenario SSP5-8.5: (a) ERY, (b) MID, and (c) END. Each row plots correspond to indices of meanTa, totPr, maxDa, and nonPr, respectively. The number of data points for making distribution is 520 (40 locations  $\times$  13 (12 months + year)).

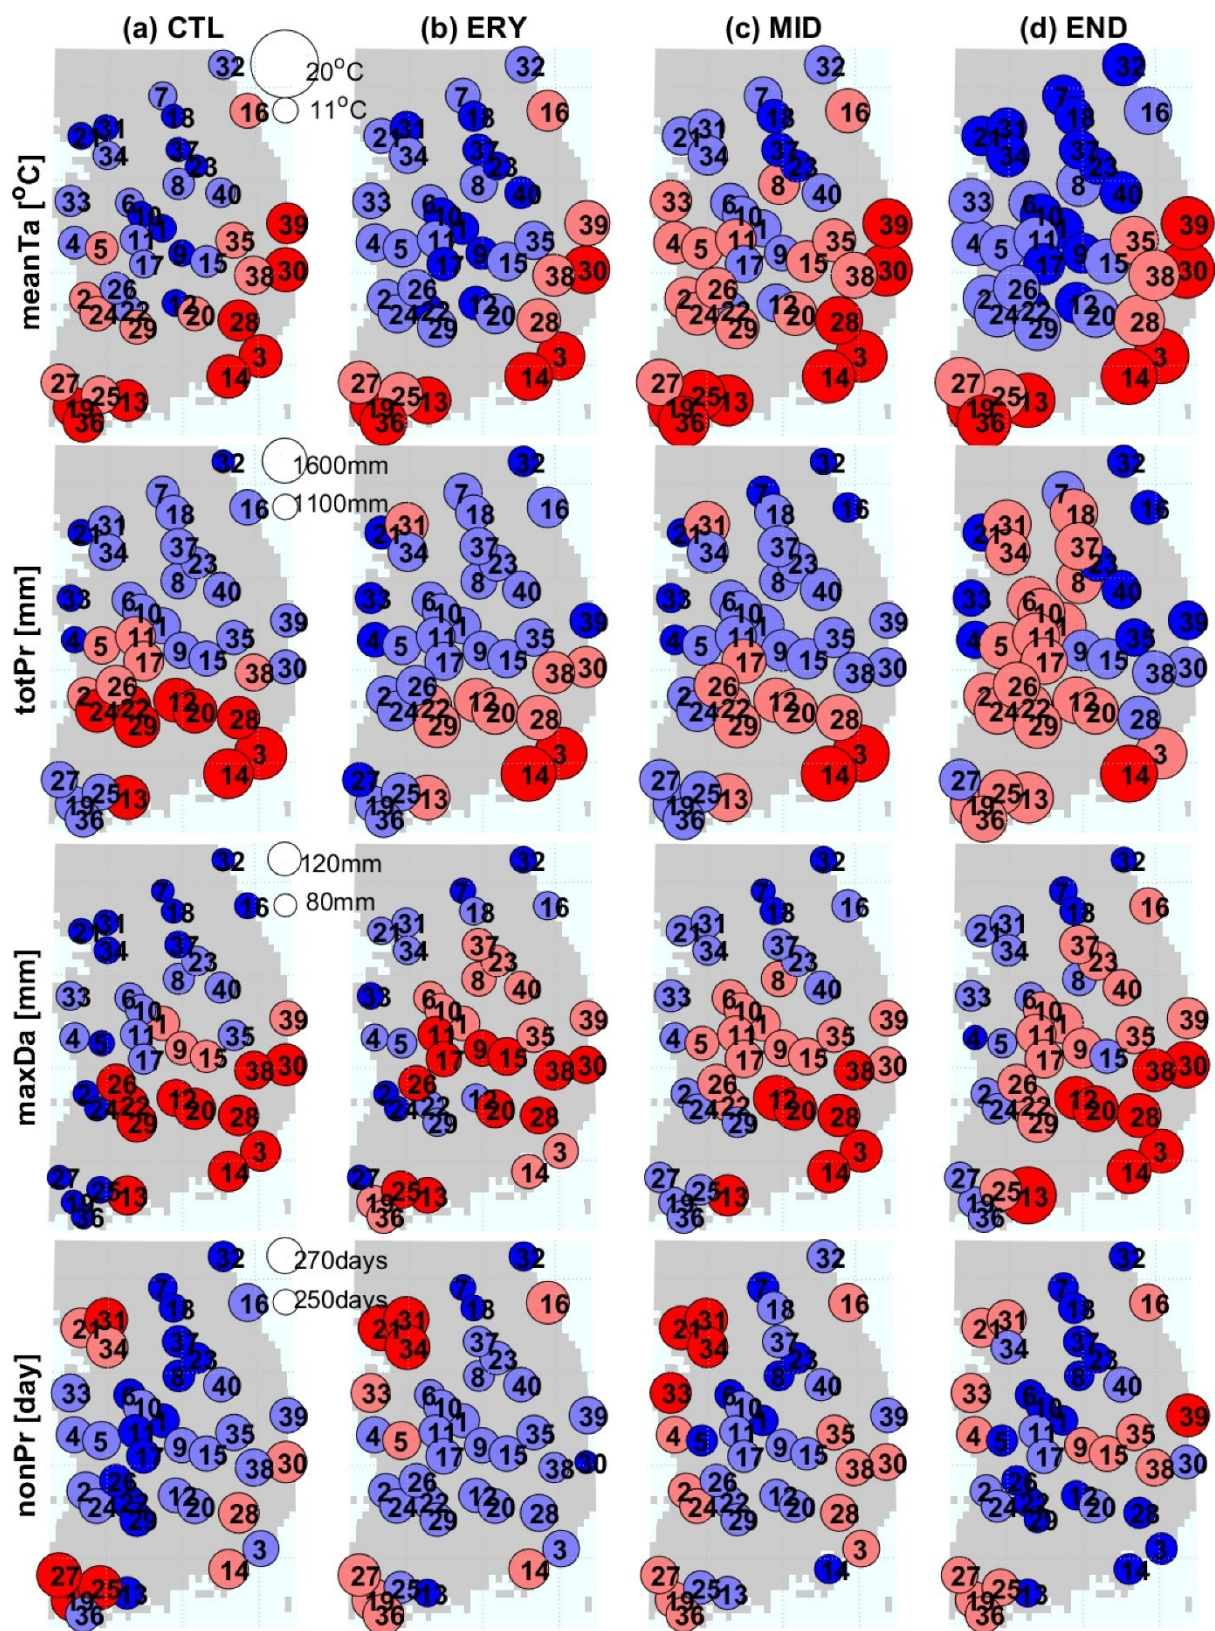

Figure S2. Similar to Fig. 3, but for SSP2-4.5

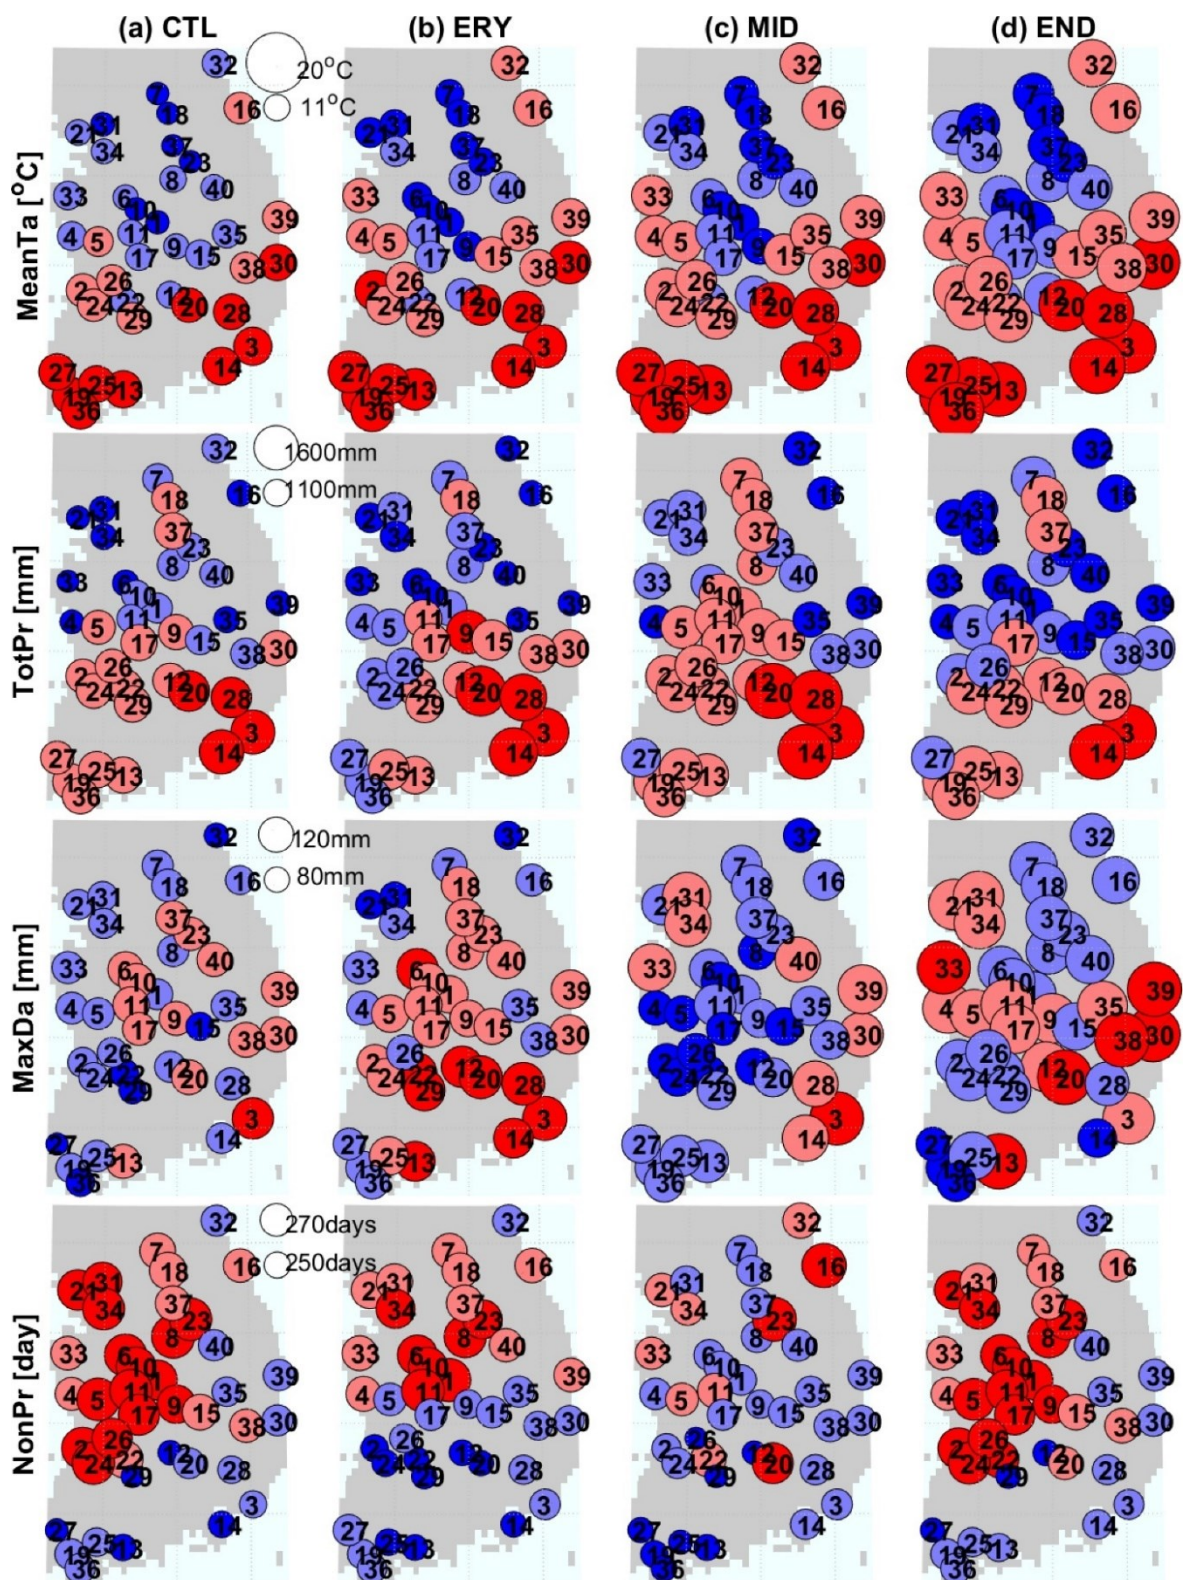

**Figure S3.** Similar to **Fig. 3**, but for scenario RCP 8.5 of CMIP5.

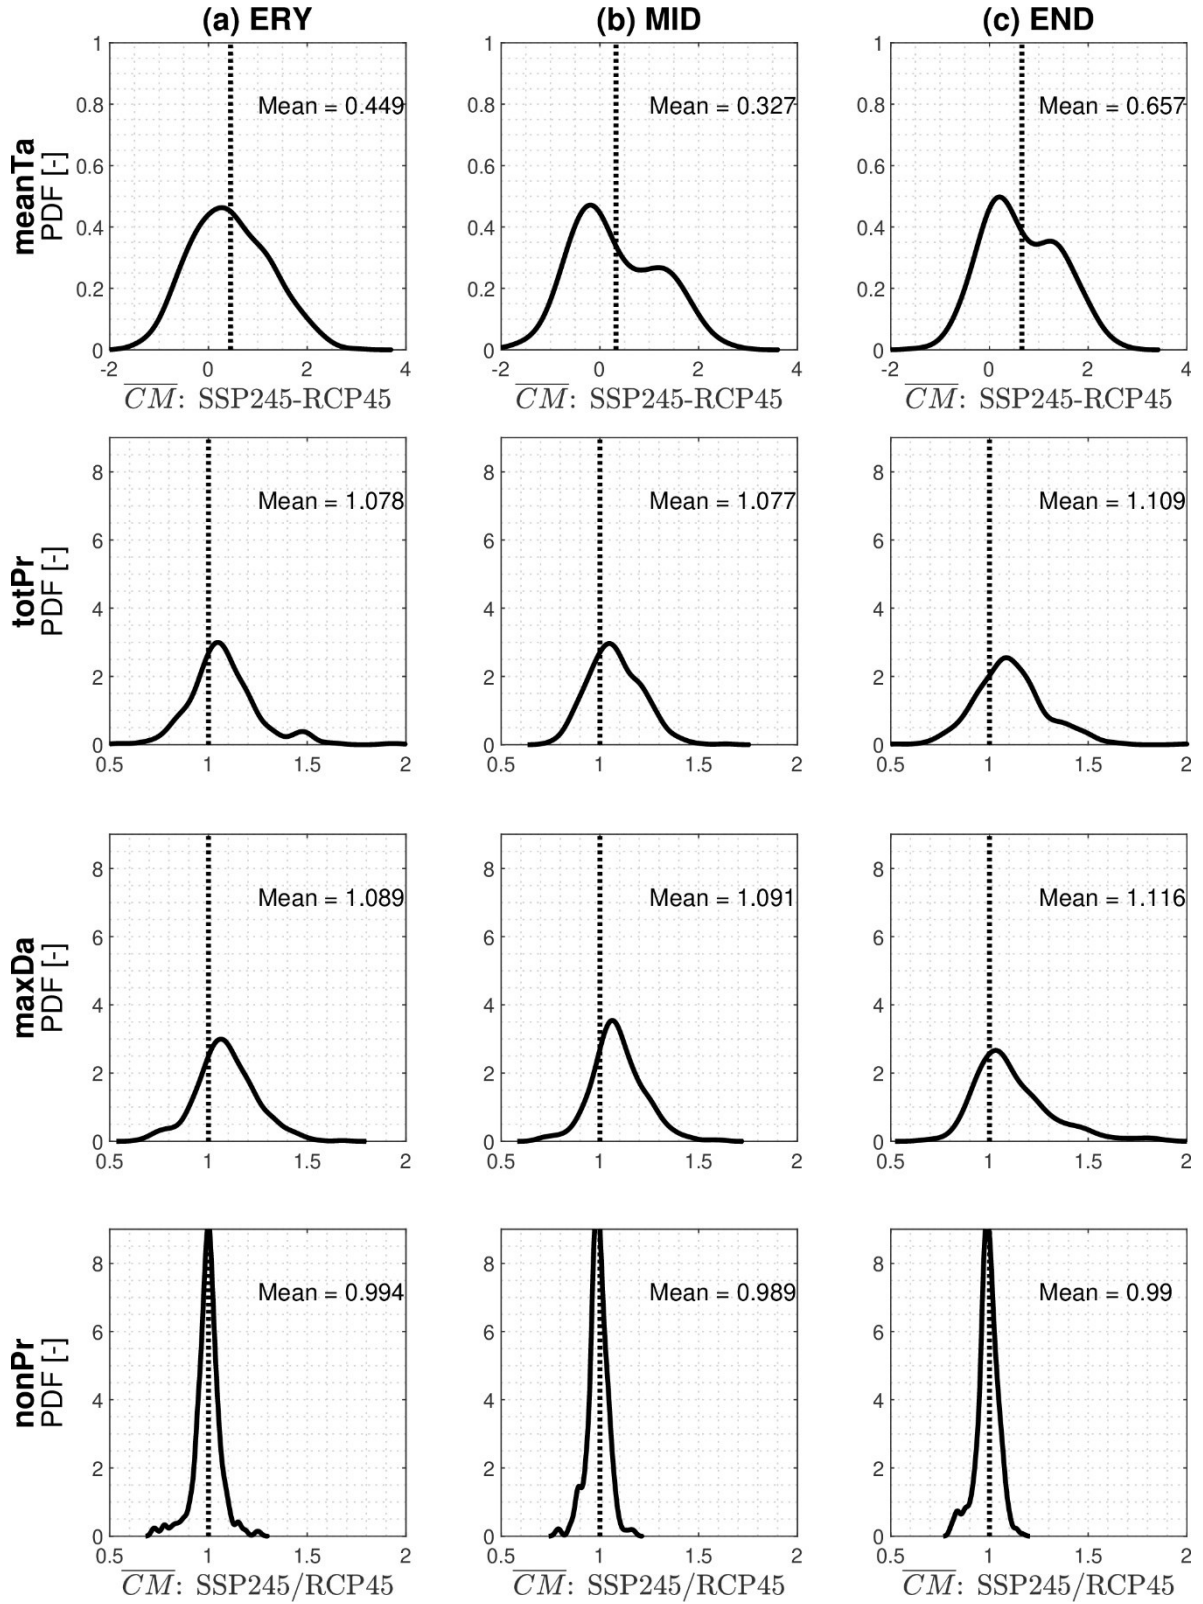

**Figure S4.** Similar to **Fig. 4**, but for SSP2-4.5 in CMIP6 and RCP 4.5 in CMIP5.

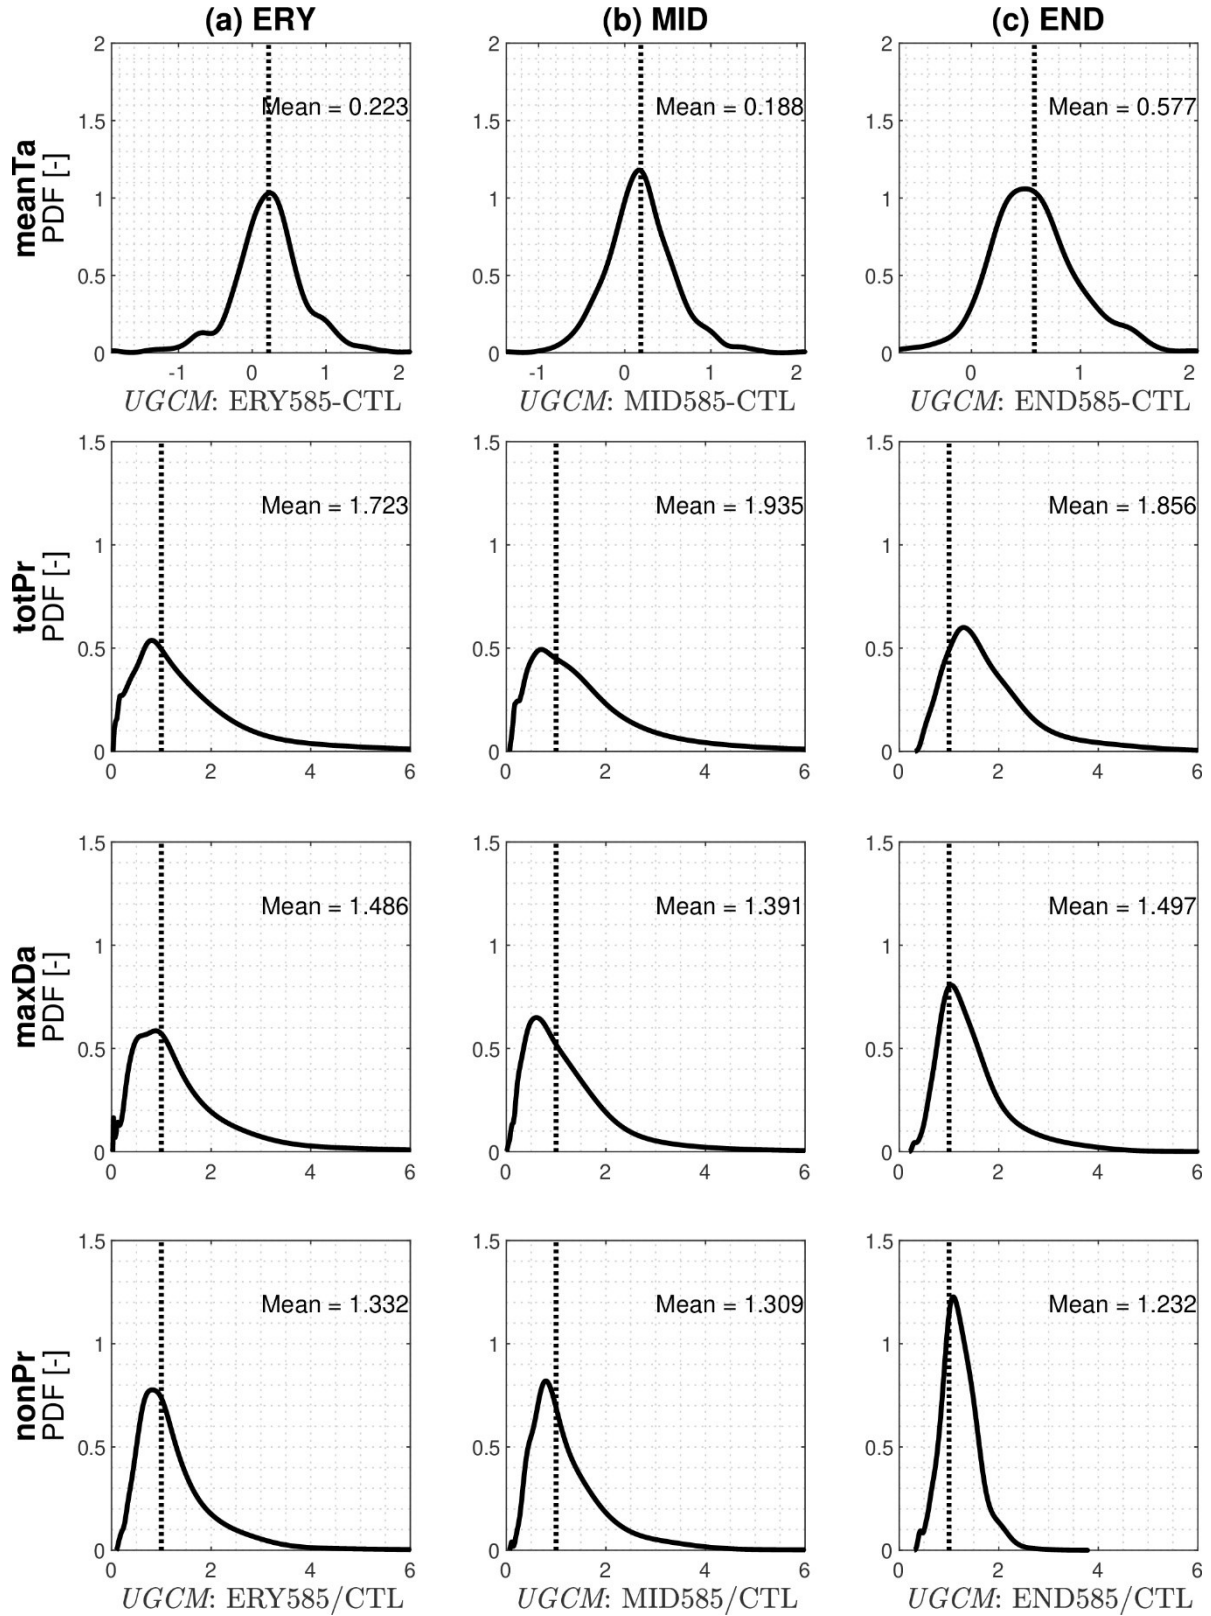

**Figure S5.** Non-parametric kernel distribution for the FOCs of the *UGCM* values over South Korea with scenario SSP5-8.5: (a) ERY, (b) MID, and (c) END. Each row plots correspond to indices of meanTa, totPr, maxDa, and nonPr, respectively. The number of data points for making distribution is 520 (40 locations  $\times$  13 (12 months + year)).

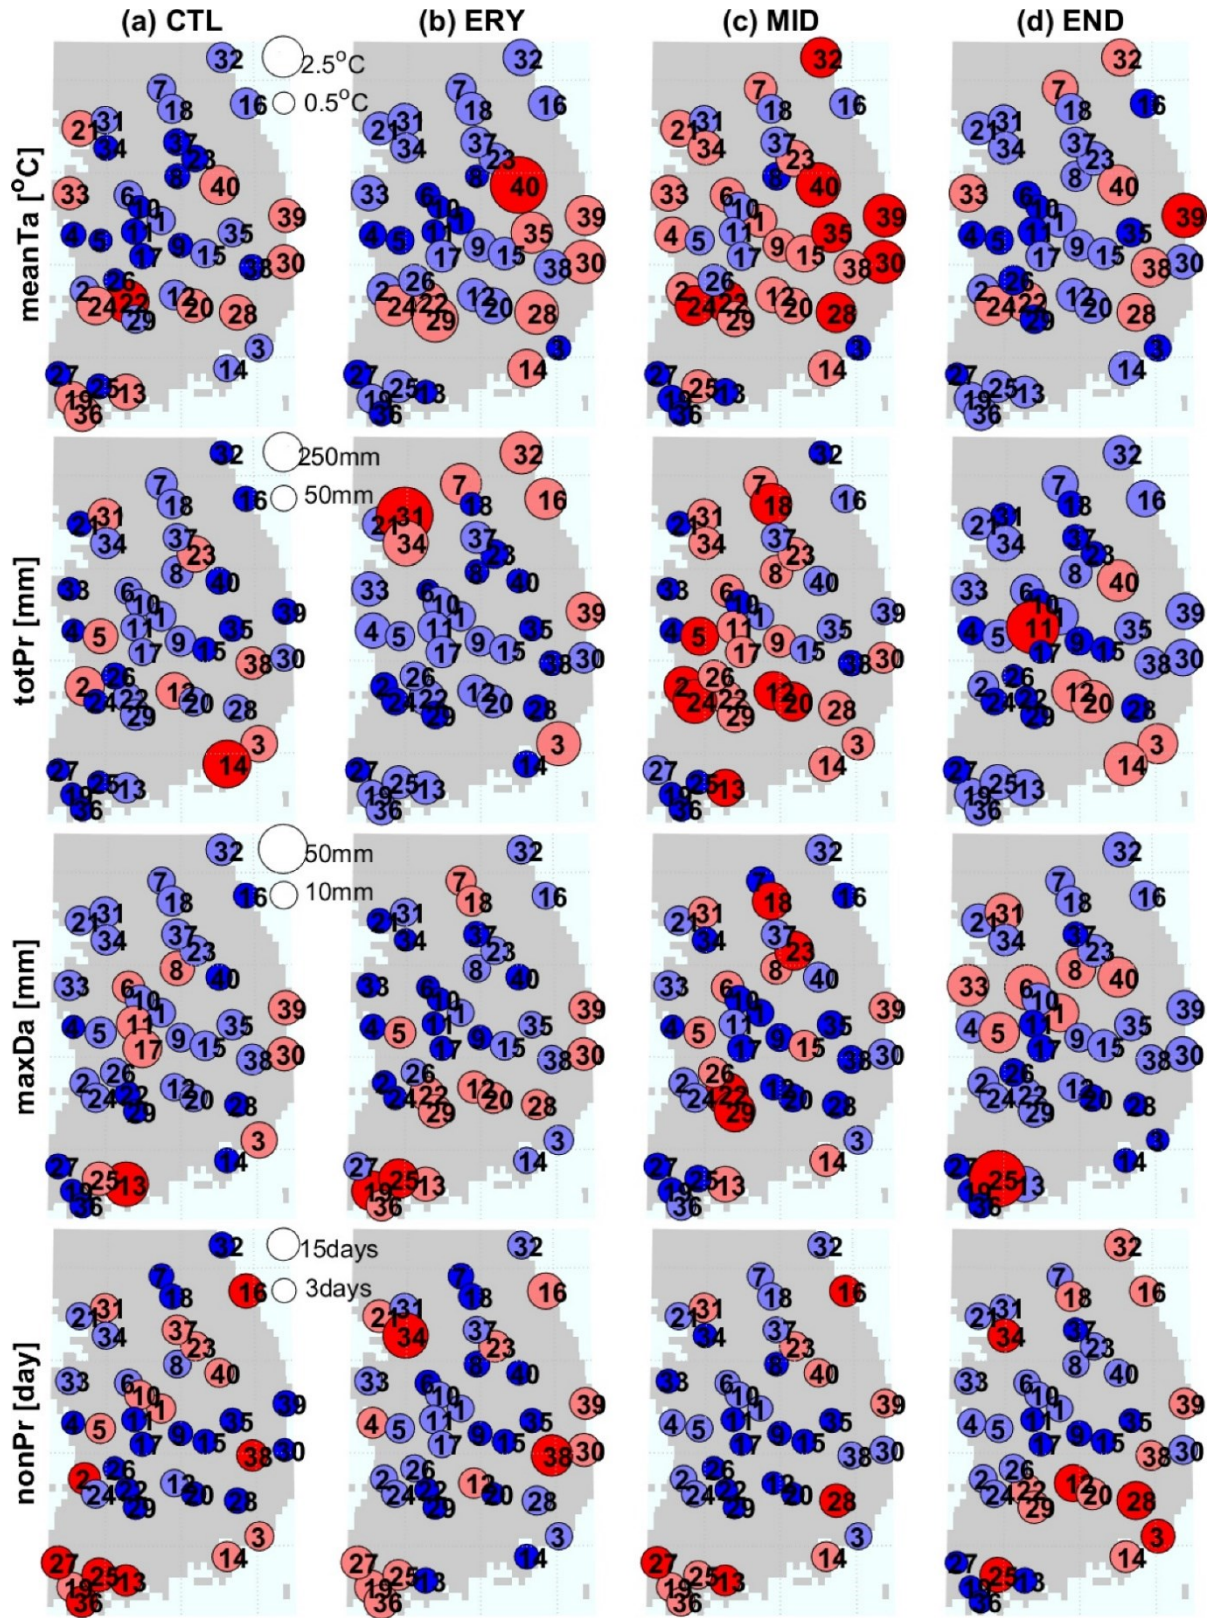

Figure S6. Similar to Fig. 5, but for SSP2-4.5.

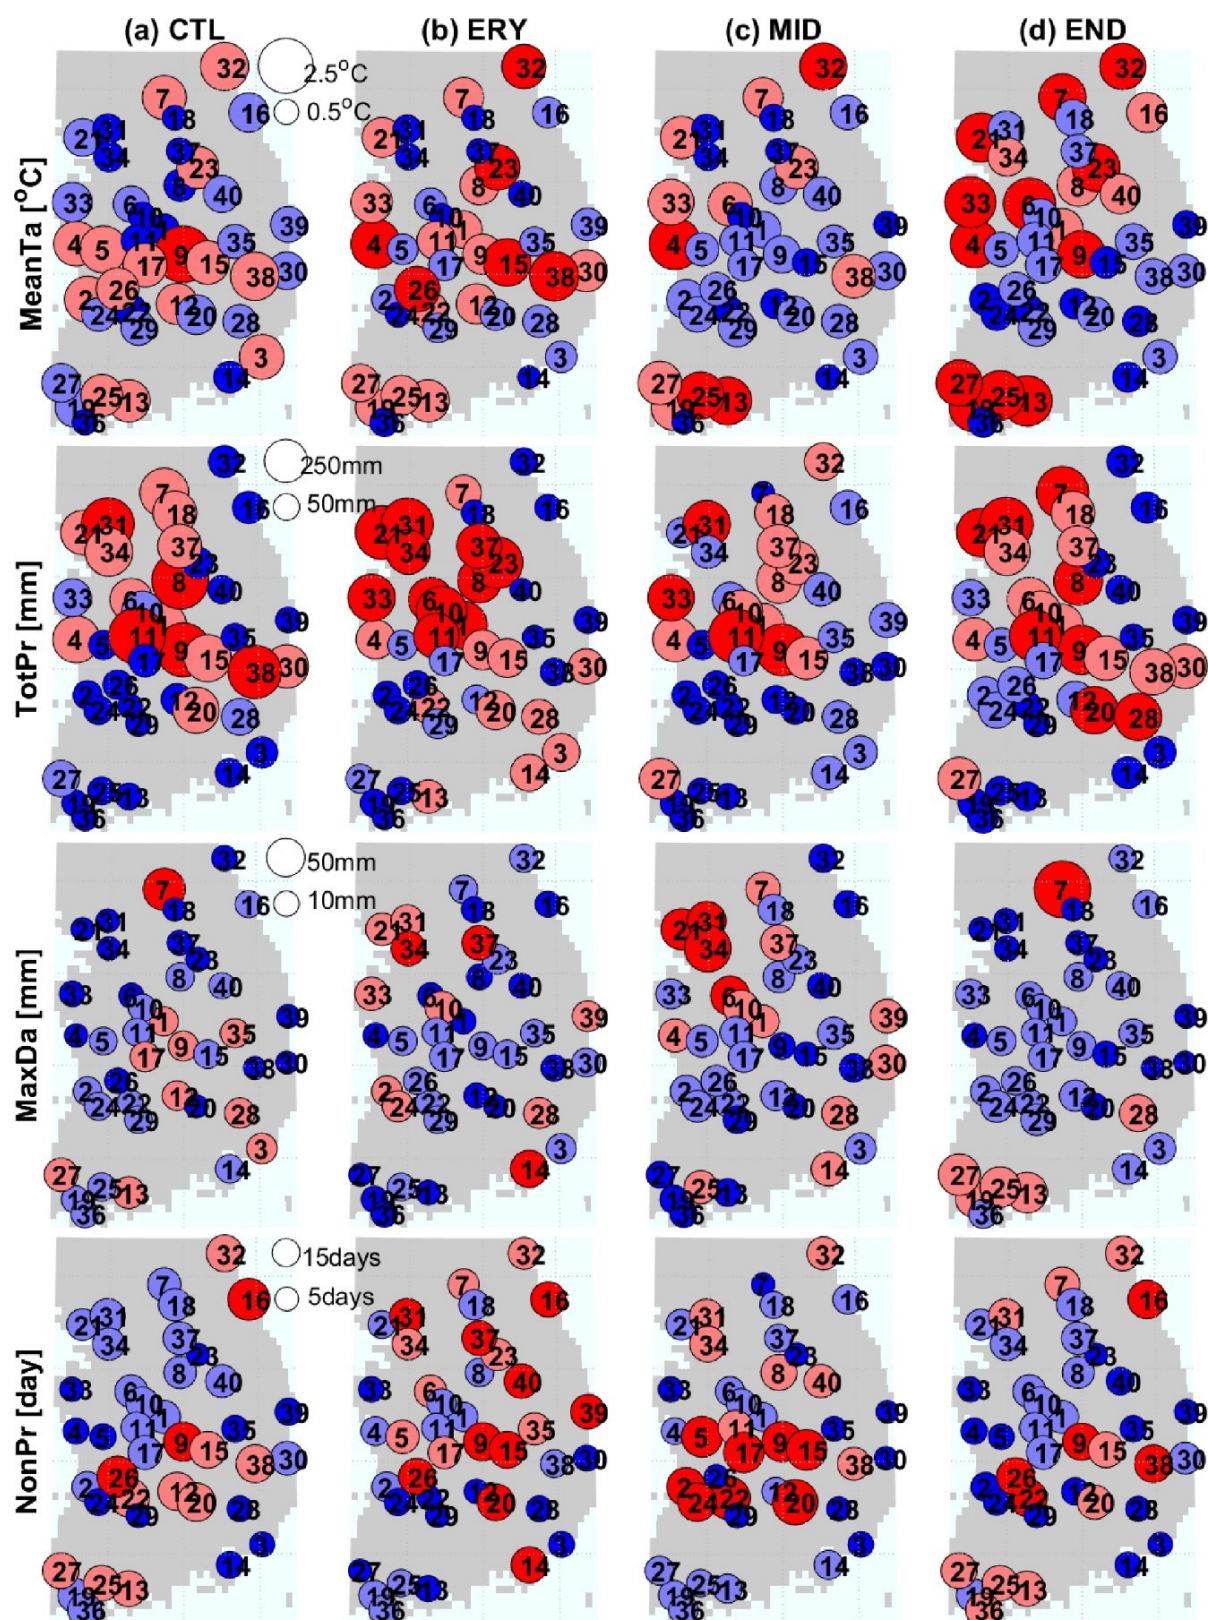

Figure S7. Similar to Fig. 5, but for RCP 8.5 of CMIP5.

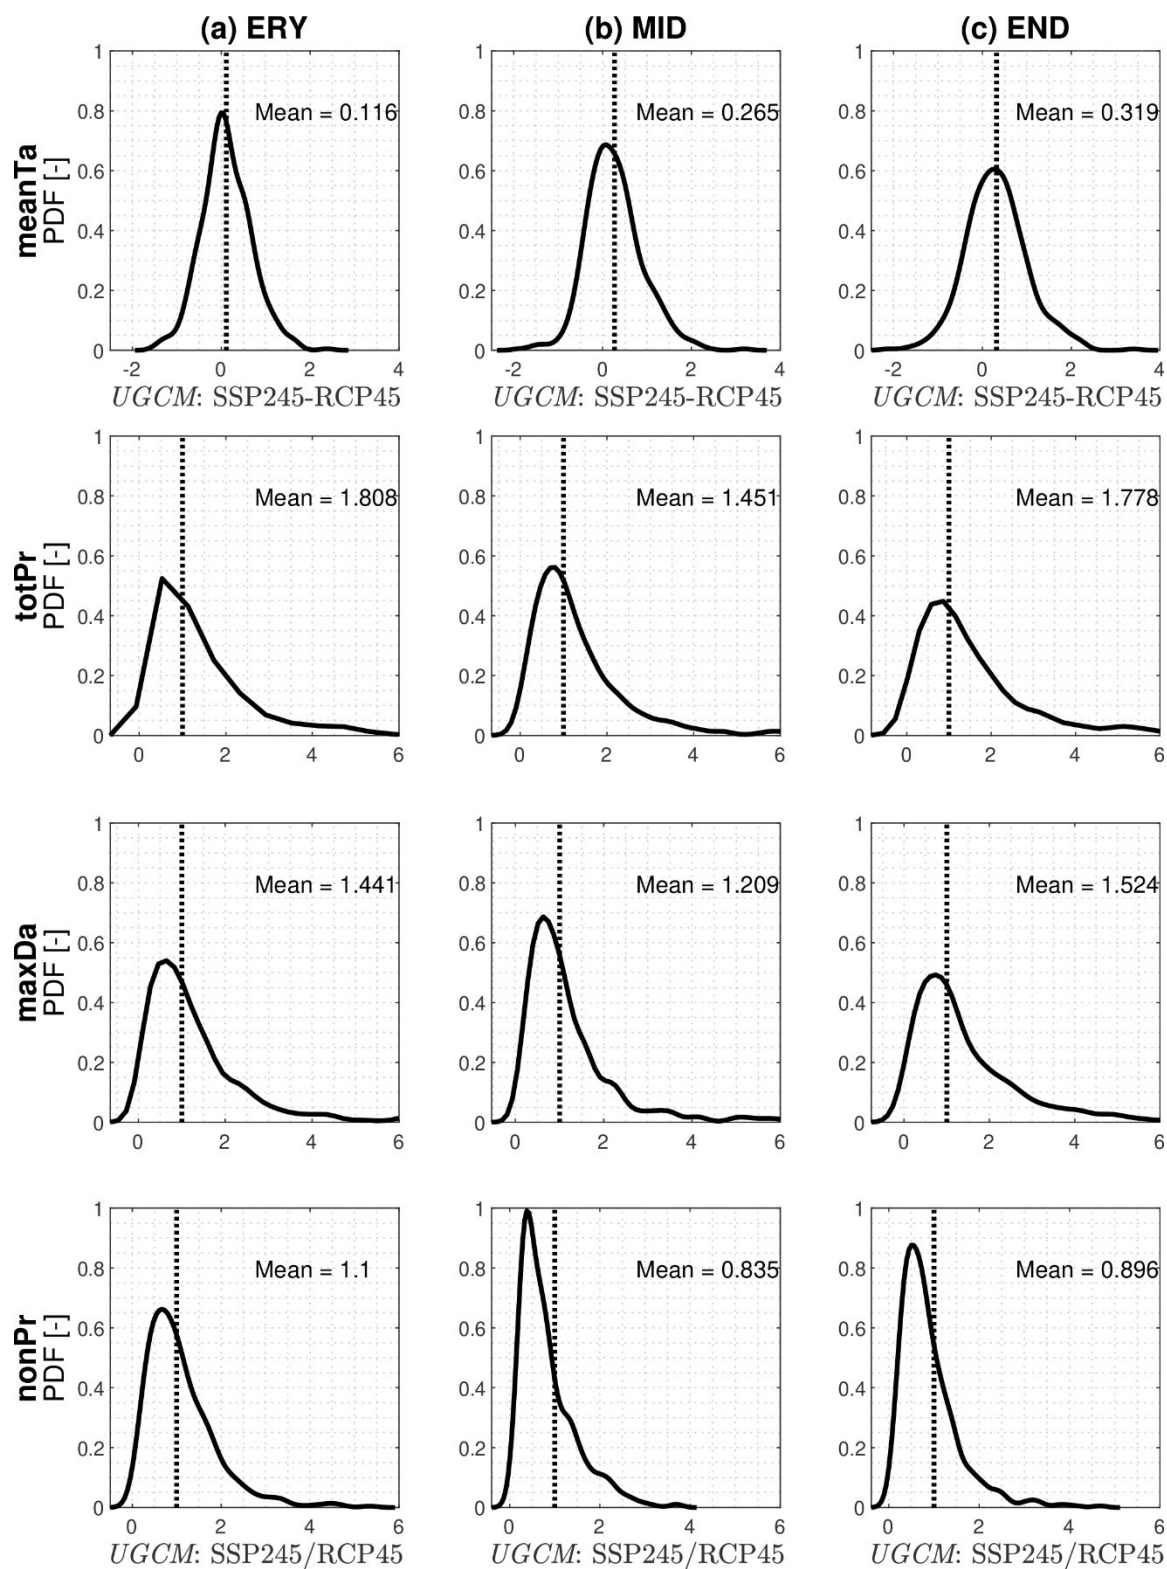

**Figure S8.** Similar to **Fig. 6**, but for SSP2-4.5 in CMIP6 and RCP 4.5 in CMIP5

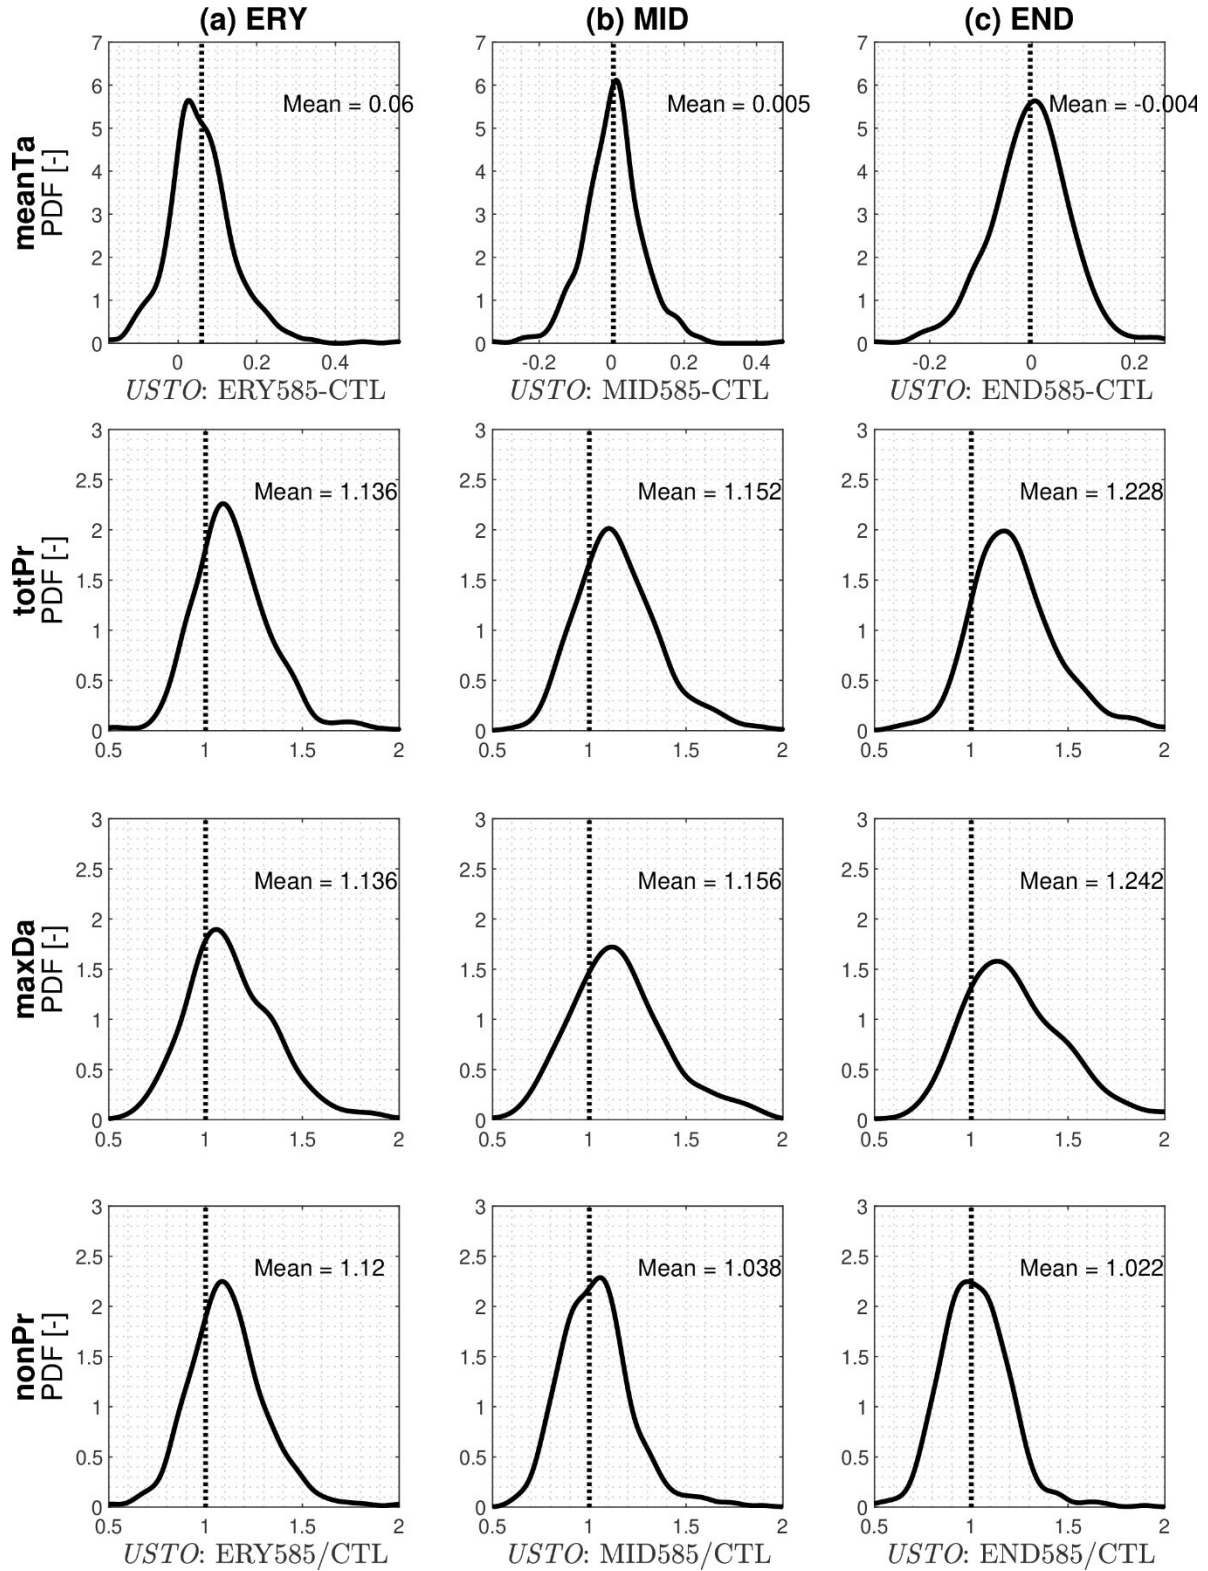

**Figure S9.** Non-parametric kernel distribution for the FOCs of *STOU* values between future and control period for scenarios of SSP5-8.5: (a) ERY, (b) MID, and (c) END. Each row plots correspond to indices of meanTa, totPr, maxDa, and nonPr, respectively. The number of data points for making distribution is 520 (40 locations  $\times$  13 (12 months + year)).

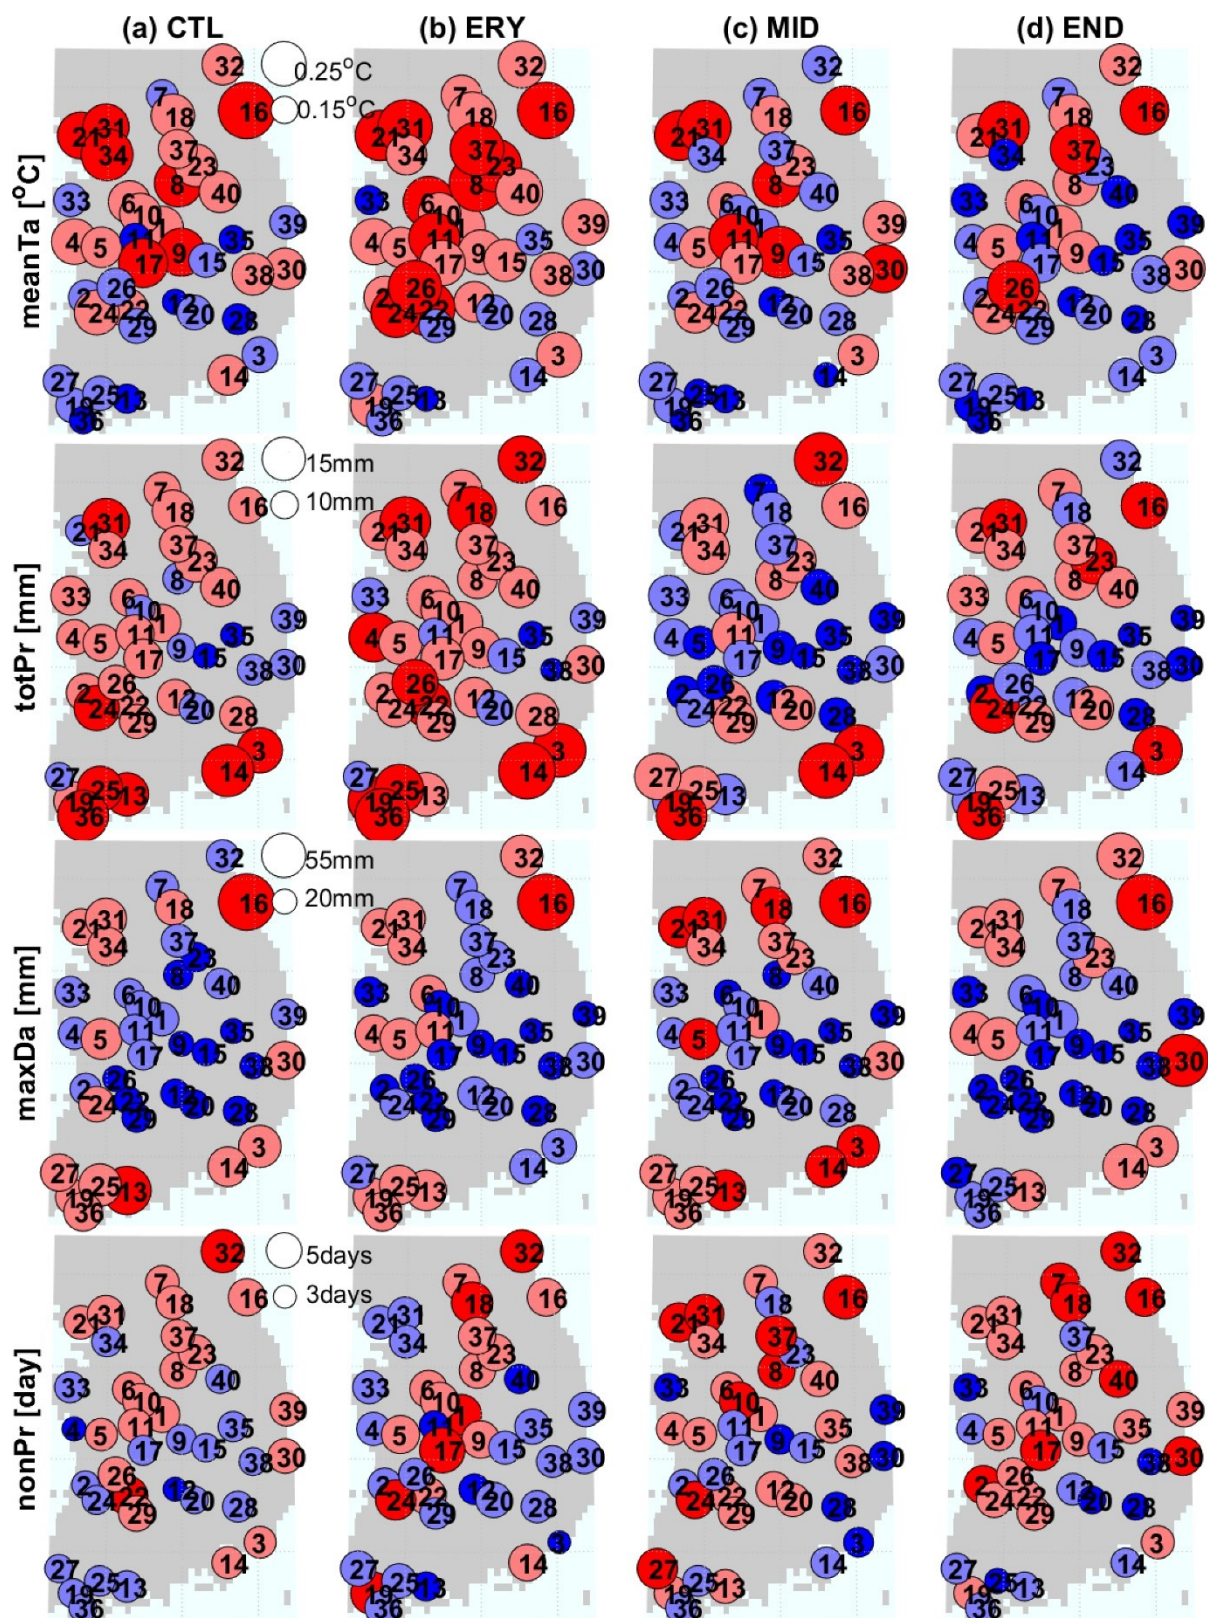

Figure S10. Similar to Fig. 7, but for SSP2-4.5

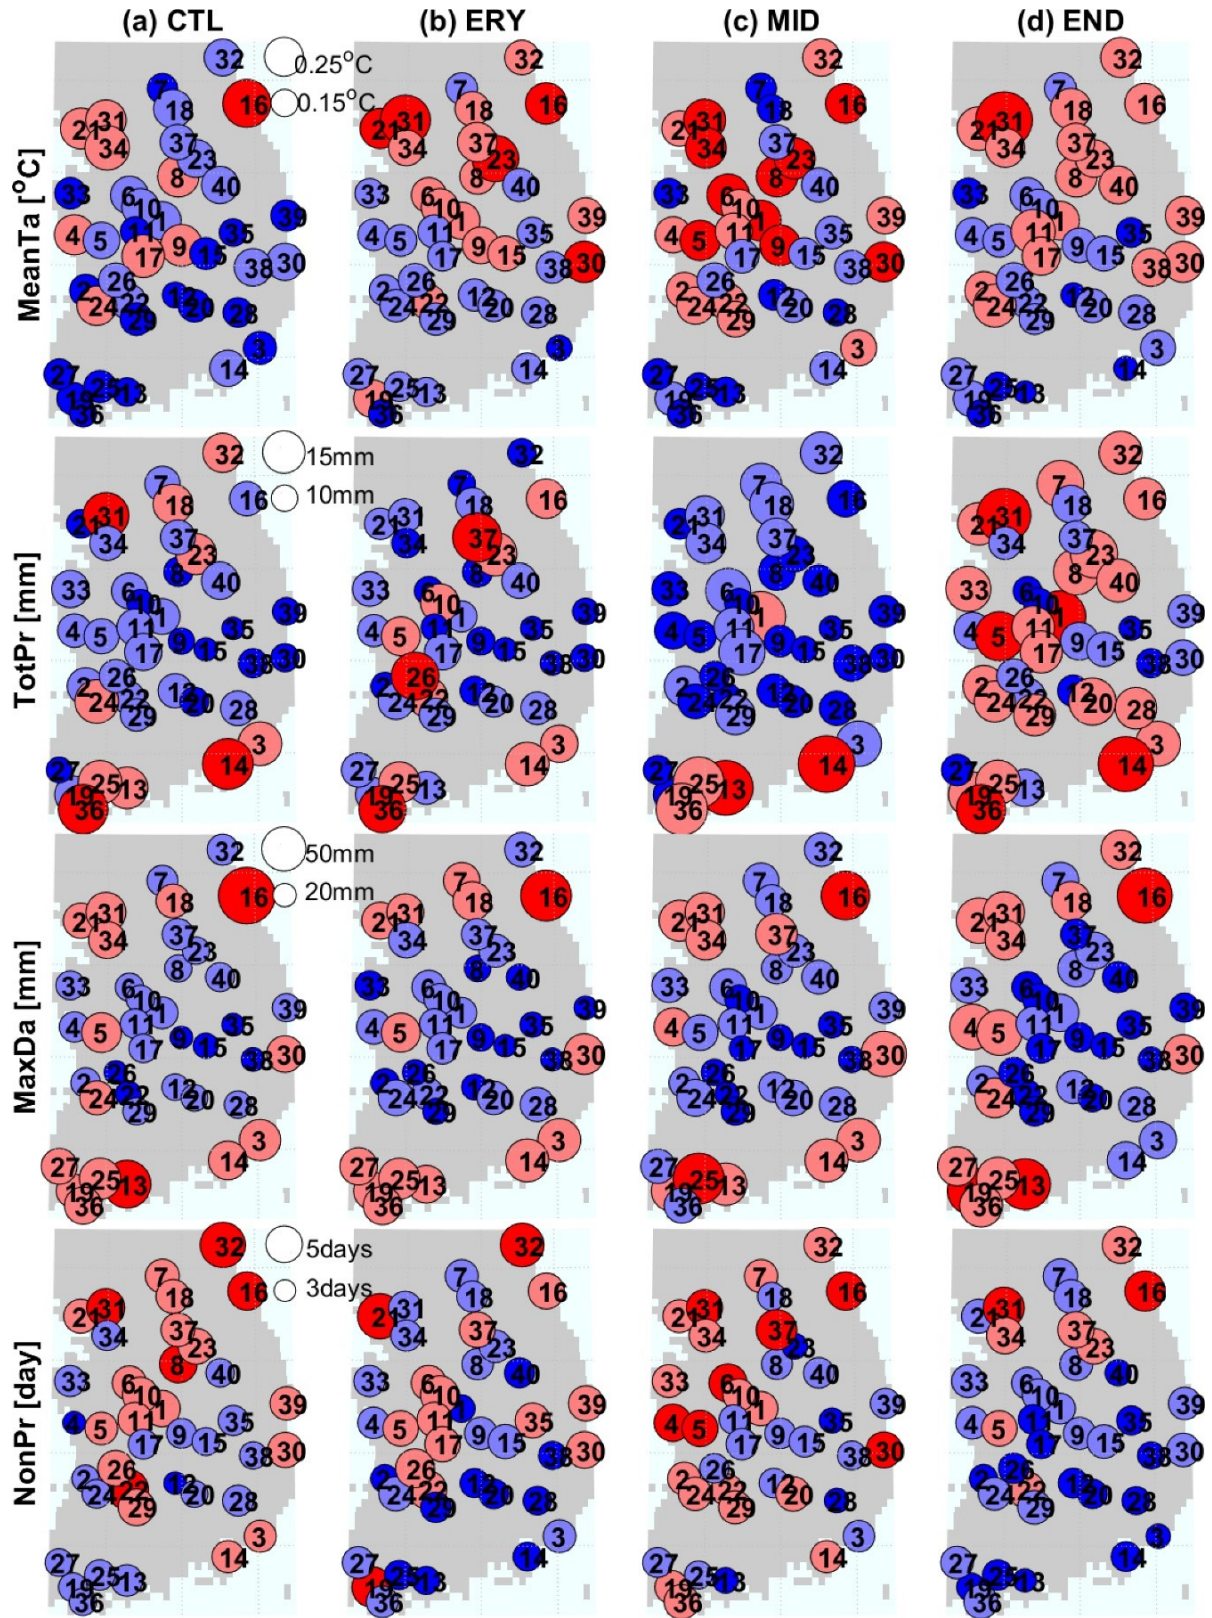

Figure S11. Similar to Fig. 7, but for RCP 8.5 of CMIP5.

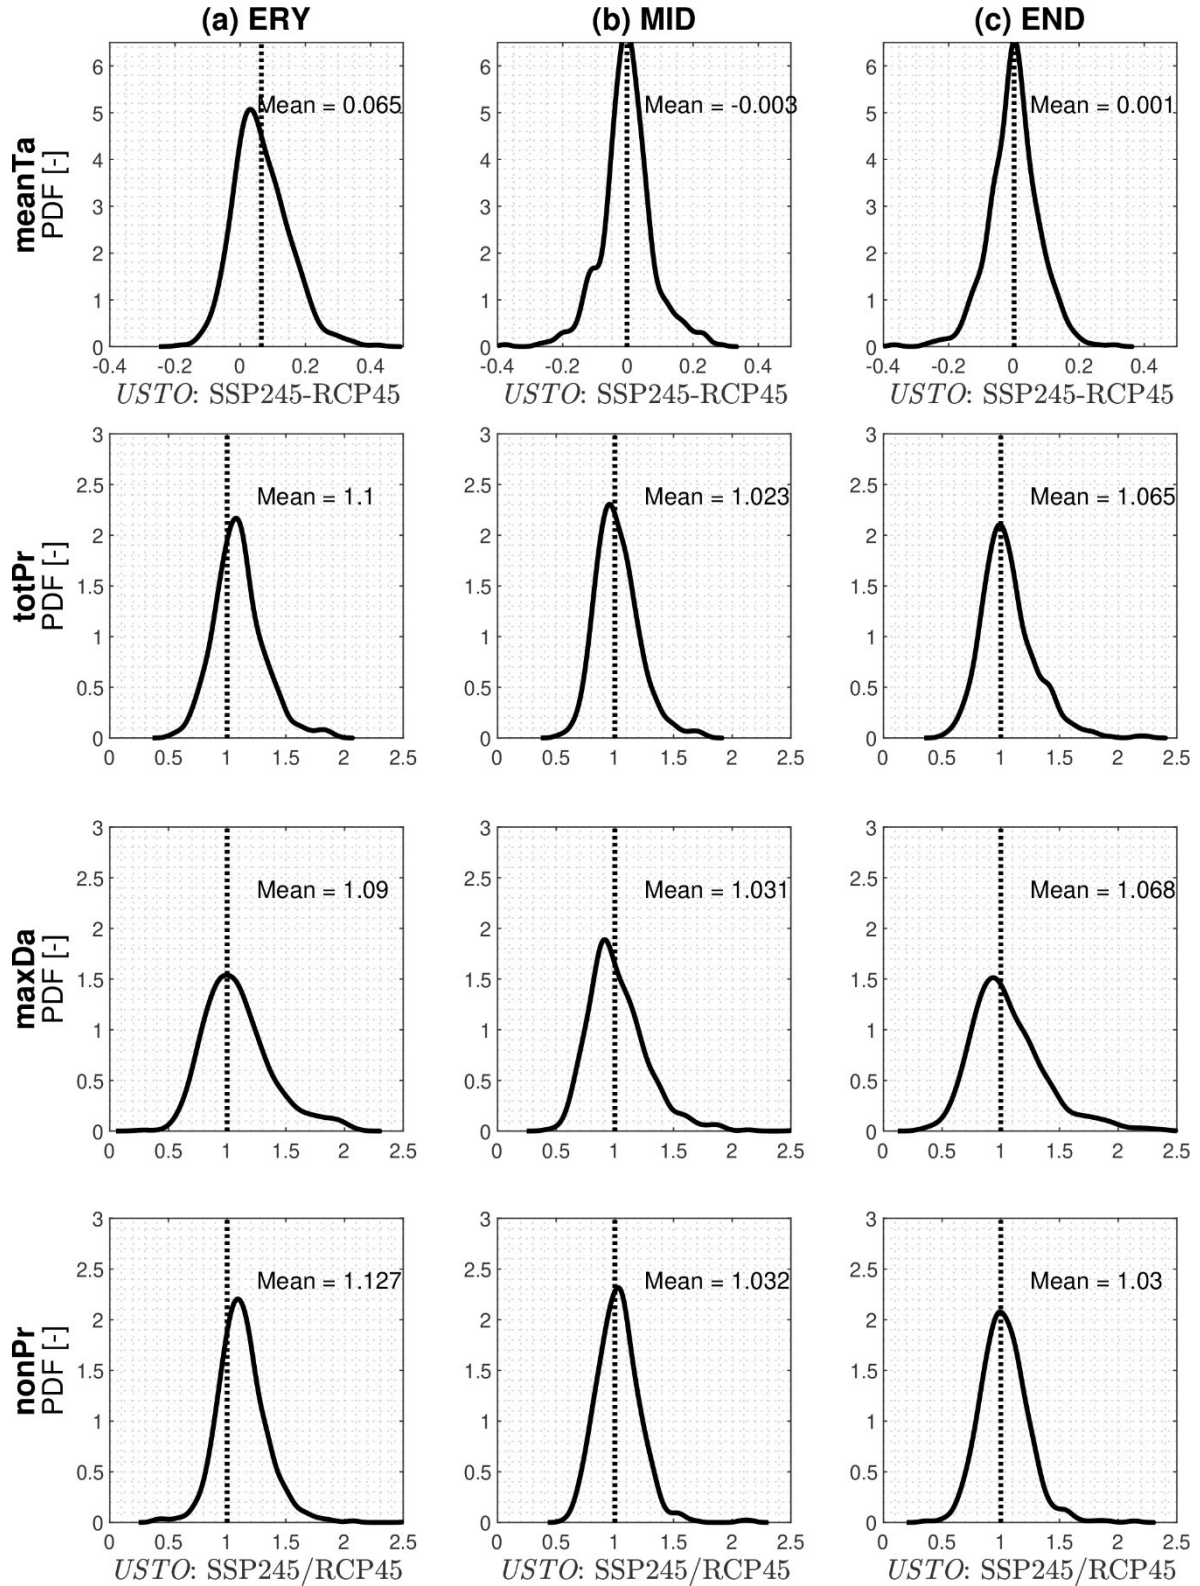

**Figure S12.** Similar to **Fig. 8**, but for SSP2-4.5 in CMIP6 and RCP 4.5 in CMIP5

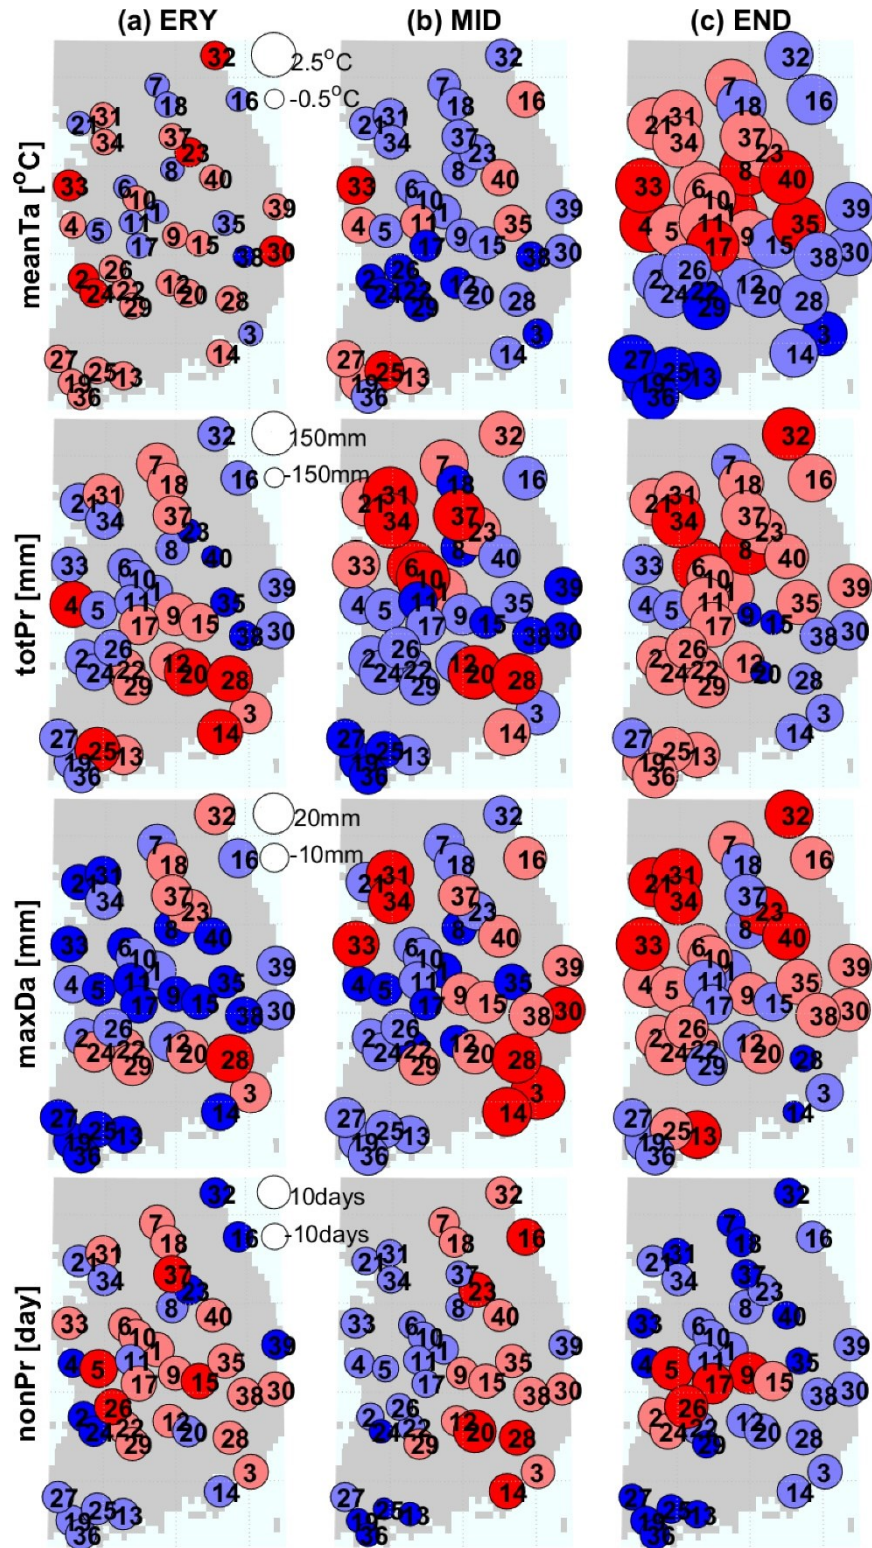

Figure S13. Similar to Fig. 9 but for CMIP5.

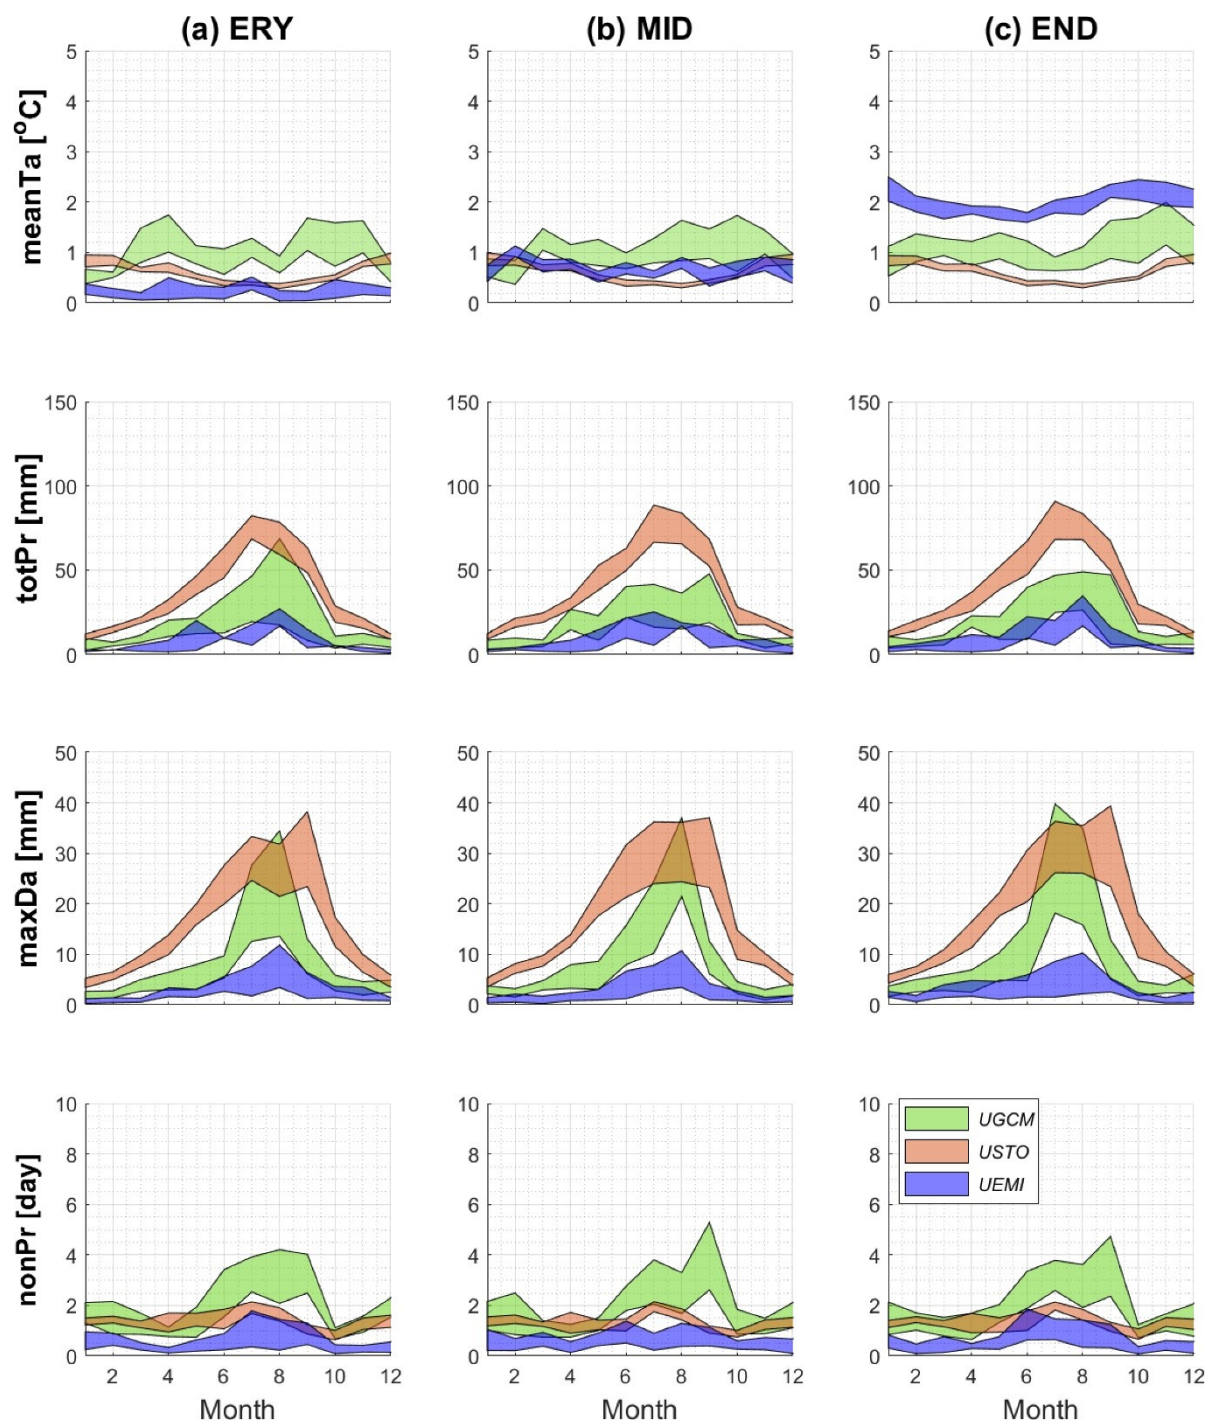

Figure S14. Similar to Fig. 11, but for CMIP5

**Table S1:** List of 40 stations over South Korea

| No. | Station name  | Station ID | Latitude | Longitude |
|-----|---------------|------------|----------|-----------|
| 1   | Boeun         | BON        | 36.488   | 127.734   |
| 2   | Buan          | BUN        | 35.727   | 126.717   |
| 3   | Busan         | BUS        | 35.105   | 129.032   |
| 4   | Boryeong      | BYG        | 36.327   | 126.557   |
| 5   | Buyeo         | BYO        | 36.272   | 126.921   |
| 6   | Cheonan       | CAN        | 36.762   | 127.293   |
| 7   | Chuncheon     | CCN        | 37.903   | 127.736   |
| 8   | Cheongju      | CEU        | 36.639   | 127.441   |
| 9   | Chupungnyeong | CPY        | 36.220   | 127.995   |
| 10  | Chungju       | CUJ        | 36.970   | 127.953   |
| 11  | Daejeon       | DJN        | 36.372   | 127.372   |
| 12  | Geochang      | GCG        | 35.667   | 127.910   |
| 13  | Goheung       | GHG        | 34.618   | 127.276   |
| 14  | Geoje         | GJE        | 34.888   | 128.605   |
| 15  | Gumi          | GMI        | 36.131   | 128.321   |
| 16  | Gangneung     | GNG        | 37.751   | 128.891   |
| 17  | Geumsan       | GSN        | 36.103   | 127.482   |
| 18  | Hongcheon     | HCN        | 37.684   | 127.880   |
| 19  | Haenam        | HNM        | 34.554   | 126.569   |
| 20  | Hapcheon      | HPC        | 35.562   | 128.170   |
| 21  | Incheon       | ICN        | 37.478   | 126.625   |
| 22  | Imsil         | ISL        | 35.612   | 127.286   |
| 23  | Jecheon       | JCN        | 37.159   | 128.194   |
| 24  | Jeongeup      | JGP        | 35.563   | 126.839   |
| 25  | Jangheung     | JHG        | 34.689   | 126.920   |
| 26  | Jeonju        | JNJ        | 35.841   | 127.117   |
| 27  | Mokpo         | MKP        | 34.817   | 126.381   |
| 28  | Miryang       | MYG        | 35.492   | 128.744   |
| 29  | Namwon        | NWN        | 35.421   | 127.397   |
| 30  | Pohang        | PHG        | 36.032   | 129.380   |
| 31  | Seoul         | SEL        | 37.571   | 126.966   |
| 32  | Sokcho        | SKC        | 38.251   | 128.565   |
| 33  | Seosan        | SSN        | 36.777   | 126.494   |
| 34  | Suwon         | SWN        | 37.272   | 126.985   |
| 35  | Uiseong       | USG        | 36.356   | 128.689   |
| 36  | Wando         | WDO        | 34.396   | 126.702   |
| 37  | Wonju         | WNJ        | 37.338   | 127.947   |
| 38  | Yeongcheon    | YCN        | 35.977   | 128.951   |
| 39  | Yeongdeok     | YDK        | 36.533   | 129.409   |
| 40  | Yeongju       | YJU        | 36.872   | 128.517   |

**Table S2.** Comparisons of the factor of change (FOC) computed as difference (for temperature) or ratio (for precipitation indices) of  $\overline{CM}$ ,  $UGCM$ , and  $USTO$  values between future and control periods over the 40 locations and 13 (12 months +1 year) between scenario RCP 8.5 for CMIP5 and SSP 5-8.5 for CMIP6.

| Index                 | Period | $\overline{CM}$ |       | $UGCM$ |       | $USTO$ |        |
|-----------------------|--------|-----------------|-------|--------|-------|--------|--------|
|                       |        | CMIP5           | CMIP6 | CMIP5  | CMIP6 | CMIP5  | CMIP6  |
| <b>meanTa</b><br>(°C) | ERY    | 1.42            | 1.19  | 0.04   | 0.22  | -0.002 | 0.06   |
|                       | MID    | 2.98            | 2.92  | 0.06   | 0.19  | 0.003  | 0.005  |
|                       | END    | 4.67            | 4.91  | 0.15   | 0.58  | 0.003  | -0.004 |
| <b>totPr</b><br>(%)   | ERY    | 3.5             | 1.3   | 60.4   | 72.3  | 6.8    | 13.6   |
|                       | MID    | 9.4             | 13.1  | 84.2   | 93.5  | 14.4   | 15.2   |
|                       | END    | 13.7            | 20.5  | 40.1   | 85.6  | 17.3   | 22.8   |
| <b>maxDa</b><br>(%)   | ERY    | 6.5             | 3.5   | 72.9   | 48.6  | 8.7    | 13.6   |
|                       | MID    | 11.8            | 12.1  | 84.2   | 39.1  | 17.0   | 15.6   |
|                       | END    | 17.1            | 20.3  | 52.2   | 49.7  | 19.8   | 24.2   |
| <b>nonPr</b><br>(%)   | ERY    | -0.6            | -0.9  | 15.6   | 33.2  | 1.6    | 12     |
|                       | MID    | 0.3             | -0.4  | 14.8   | 30.9  | 0.0    | 3.8    |
|                       | END    | 0.2             | -0.5  | 1.5    | 23.2  | -0.2   | 2.2    |
